# Supplementary material for: From SNPs to pathways: integration of functional effect of sequence variations on models of cell signalling pathways
Source: Springer Nature journal article supplement (doi:10.1186/1471-2105-10-s8-s6), 2009-08-01
Supplement: 12859_2009_3346_MOESM1_ESM.pdf [file 12859_2009_3346_MOESM1_ESM.pdf]

# From SNPs to pathways: Integration of functional effect of sequence variations on models of cell signalling pathways

Anna Bauer-Mehren, Laura I Furlong<sup>§</sup>, Michael Rautschka, Ferran Sanz

## Glossary

**Variation:** any kind of short range sequence variation in the nucleotide sequence of the genome. Among these we can mention SNPs and insertion-deletion variants of a small number of nucleotides, Alu sequences and other types of variations collected in dbSNP database .

**SNPs:** single nucleotide polymorphisms or SNPs are DNA sequence variations in which a single nucleotide (A, G, C or T) is altered. SNPs are also referred as polymorphisms, natural variants, or common variants because they have a minor allele frequency in the population of at least 1 %. In contrast, rare variants have a minor allele frequency of less than 1 % . SNPs can either be neutral or have an effect on gene or protein function.

**Mutation:** term used to refer to rare variants (minor allele frequency less than 1 % in the population). These variants often cause disease and segregate within families, and affect conserved residues in the protein sequence. Also used to refer to modified residues in a sequence after the experimental procedure of mutagenesis.

**Mutagenesis:** experimental procedure aimed at altering the protein sequence at residues suspected to be critical for the function of the protein.

## Identifiers and names of proteins used in the study

| Protein name (as used in this study)           | UniProt id | Protein name according to UniProt                                 |
|------------------------------------------------|------------|-------------------------------------------------------------------|
| SOS1                                           | Q07889     | Son of sevenless homolog 1                                        |
| RAS<br><br>(generic term for HRas, KRas, NRas) | P01112     | GTPase Hras                                                       |
|                                                | P01116     | GTPase Kras                                                       |
|                                                | P01111     | GTPase Nras                                                       |
| ERK<br><br>(generic term for ERK1, ERK2)       | P27361     | Mitogen-activated protein kinase 3<br><br>(ERK1)                  |
|                                                | P28382     | Mitogen-activated protein kinase 1<br><br>(ERK2)                  |
| EGFR or ErbB1                                  | P00533     | Epidermal growth factor receptor                                  |
| Grb2                                           | P62993     | Growth factor receptor-bound protein<br><br>2                     |
| EGF                                            | P01133     | Pro-epidermal growth factor                                       |
| MEK<br><br>(generic term for MEK1, MEK2)       | Q02750     | Dual specificity mitogen-activated<br><br>protein kinase 1 (MEK1) |
|                                                | P36507     | Dual specificity mitgen-activated<br><br>protein kinase 2 (MEK2)  |
| MEKstar (activated MEK1)                       | Q02750     | Dual specificity mitogen-activated<br><br>protein kinase 1 (MEK1) |
| RAF                                            | P04049     | RAF proto-oncogene<br><br>serine/threonine-protein kinase         |
| Akt                                            | Q9Y243     | RAC-gamma serine/threonine-protein<br><br>kinase                  |
| Aktstar (activated Akt)                        | Q9Y243     | RAC-gamma serine/threonine-protein<br><br>kinase                  |
| ErbB2 or HER2/NEU                              | P04626     | Receptor tyrosine-protein kinase                                  |

|        |        |                                                         |
|--------|--------|---------------------------------------------------------|
|        |        | erbB-2                                                  |
| ErbB3  | P21860 | Receptor tyrosine-protein kinase<br>erbB-3              |
| ErbB4  | Q15303 | Receptor tyrosine-protein kinase<br>erbB-4              |
| HRG    | Q02297 | Pro-neuregulin-1, membrane-bound<br>isoform (heregulin) |
| Gab1   | Q13480 | GRB2-associated-binding protein 1                       |
| PTP1-B | P18031 | Tyrosine-protein phosphatase non-<br>receptor type 1    |
